# Supplementary material for: Host Responses to Live-Attenuated ASFV (HLJ/18–7GD)
Source: MDPI journal article supplement (doi:10.3390/v14092003), 2022-09-10
Supplement: s1 [file s1]

Supplementary Materials:

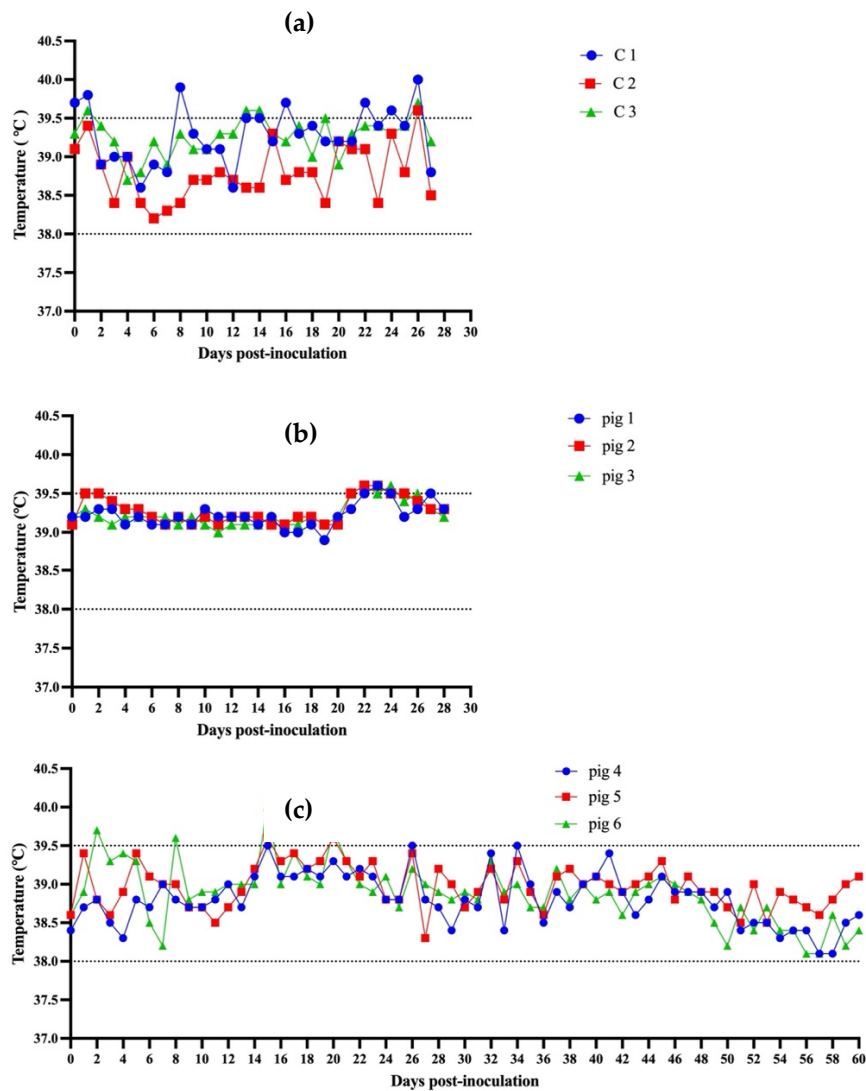

**Figure S1.** Kinetics of rectal temperatures. **(a)** Kinetics of rectal temperatures of uninfected pigs (pig C1/C2/C3) in the control group. **(b)** Kinetics of rectal temperatures of pigs (pig 1/2/3) immunized with  $10^6$  TCID<sub>50</sub> HLJ/18-7GD for 28 days. **(c)** Kinetics of rectal temperatures of pigs (pig 4/5/6) immunized with  $10^6$  TCID<sub>50</sub> HLJ/18-7GD for 60 days; Dotted line: The temperature range of normal pigs.

(a).

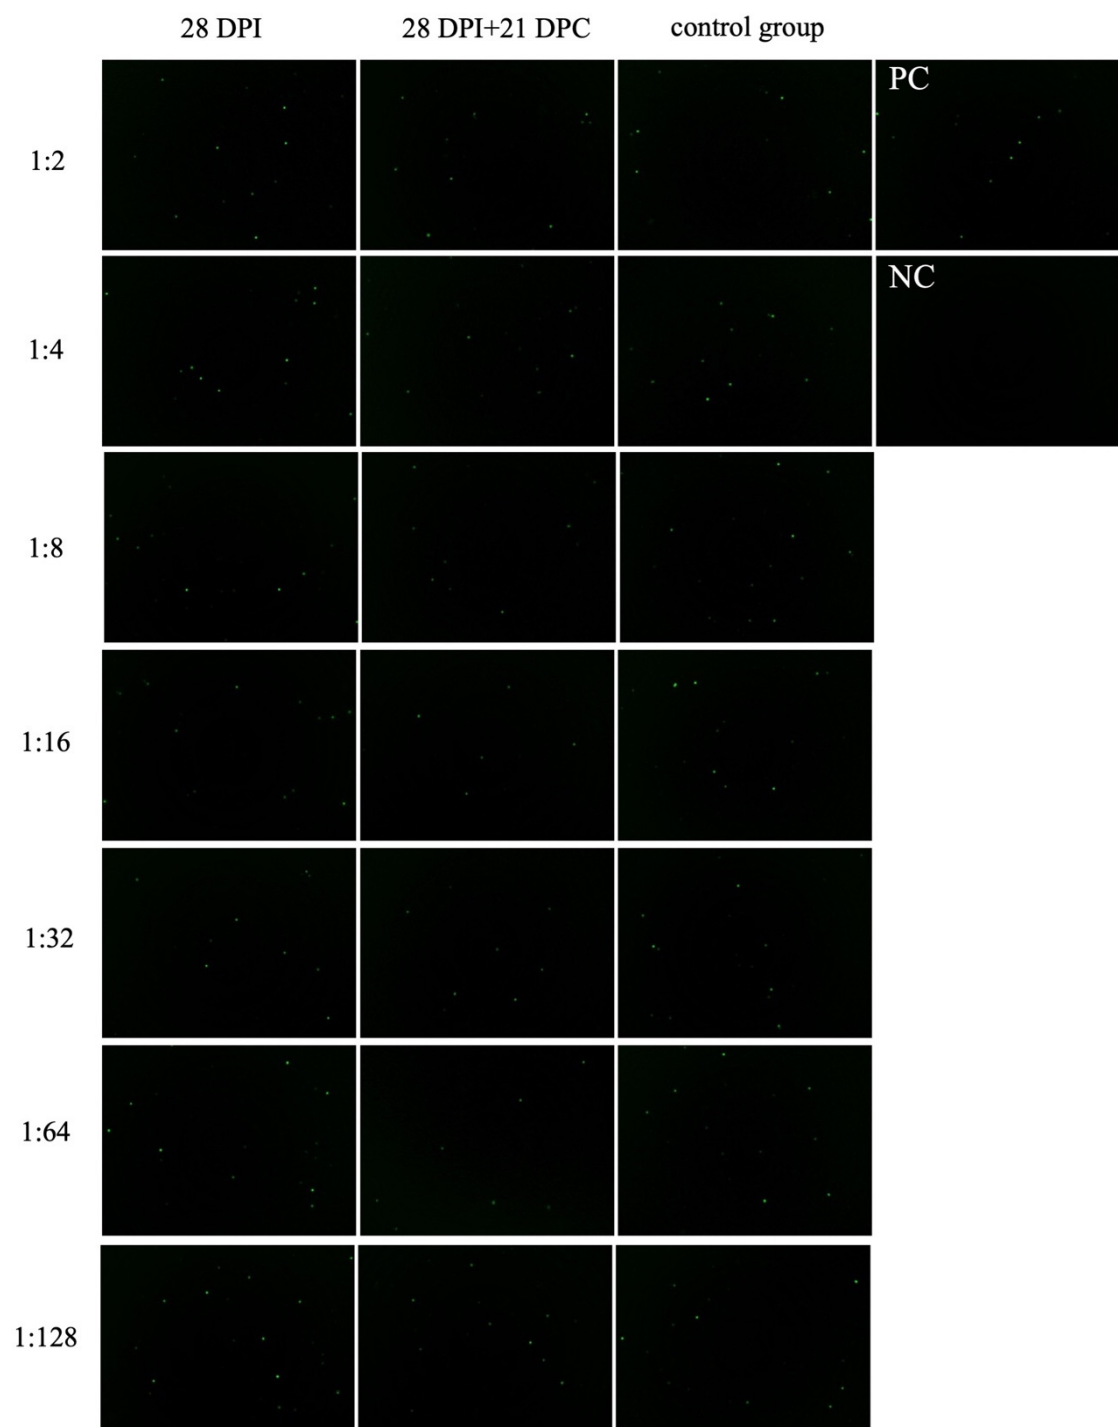

(b).

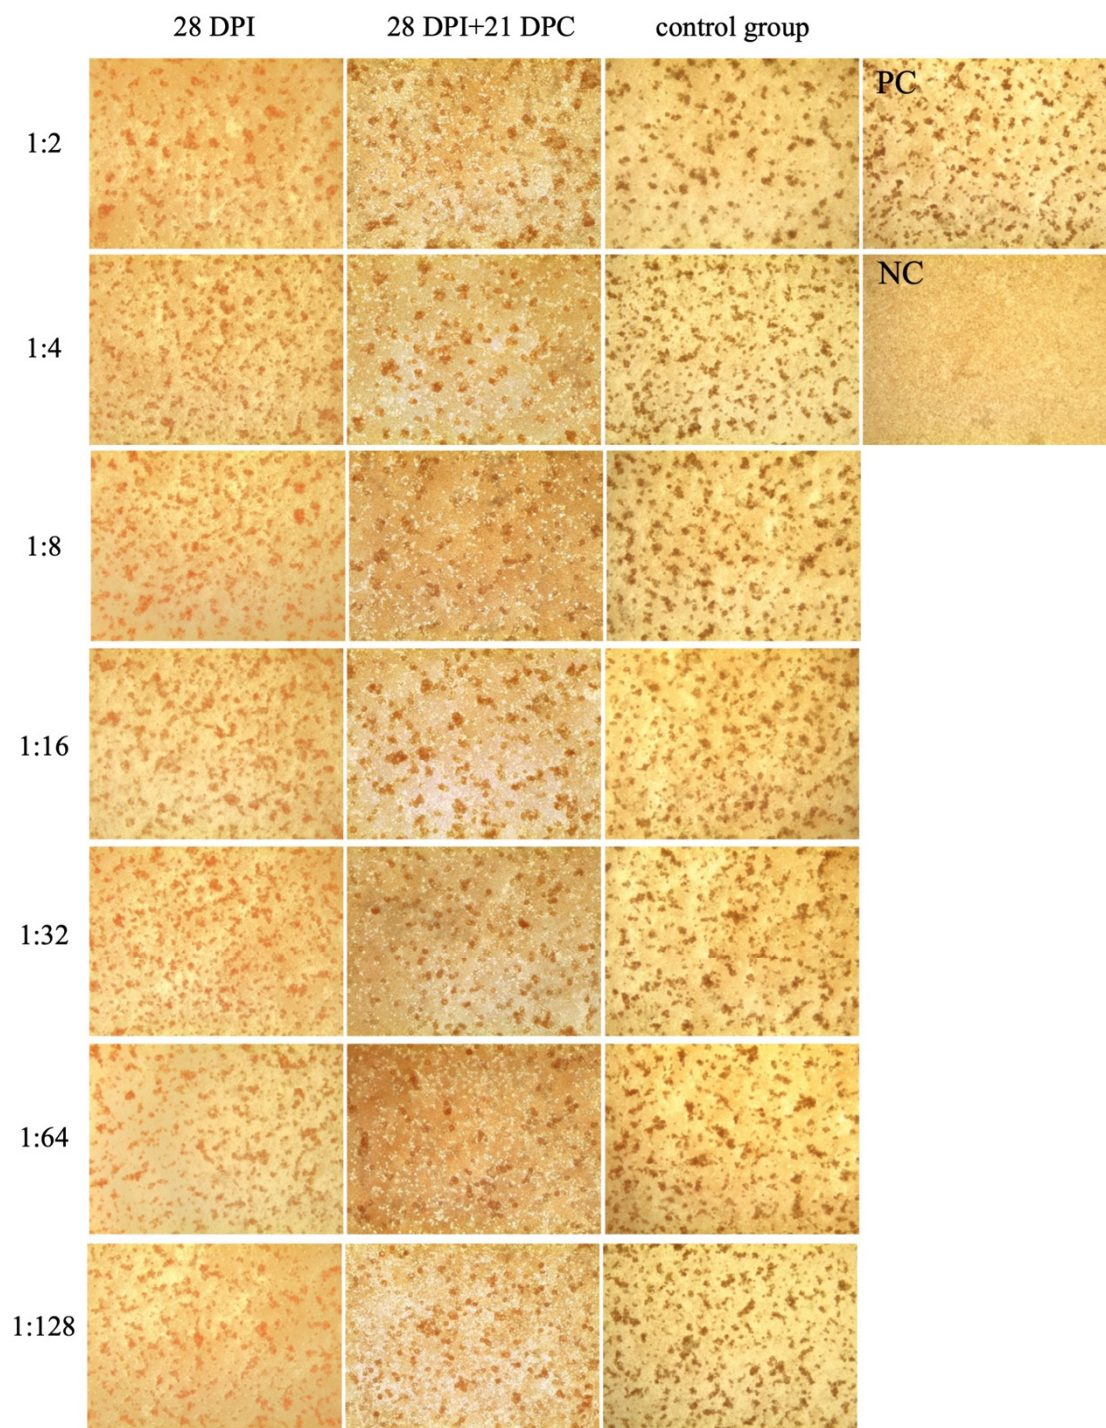

**Figure S2.** The results of the neutralization assay. **(a)** The EGFP<sup>+</sup> HLJ/18 ASFV strain in pulmonary alveolar macrophages under a fluorescence microscope at different dilution ratios of sera (1:2 to 1:128). **(b)** The results of the hemadsorption analysis. 28 DPI were pigs immunized with HLJ/18-7GD for 28 days. 28 DPI+ 21DPC were pigs challenge with HLJ/18 for 21 days at 28 DPI. control group were uninfected pigs. PC (positive control) depicts the result without the sera. NC (negative control) depicts the result without the EGFP<sup>+</sup> HLJ/18 ASFV strain. DPI, days post-inoculation; DPC, days post-challenge.



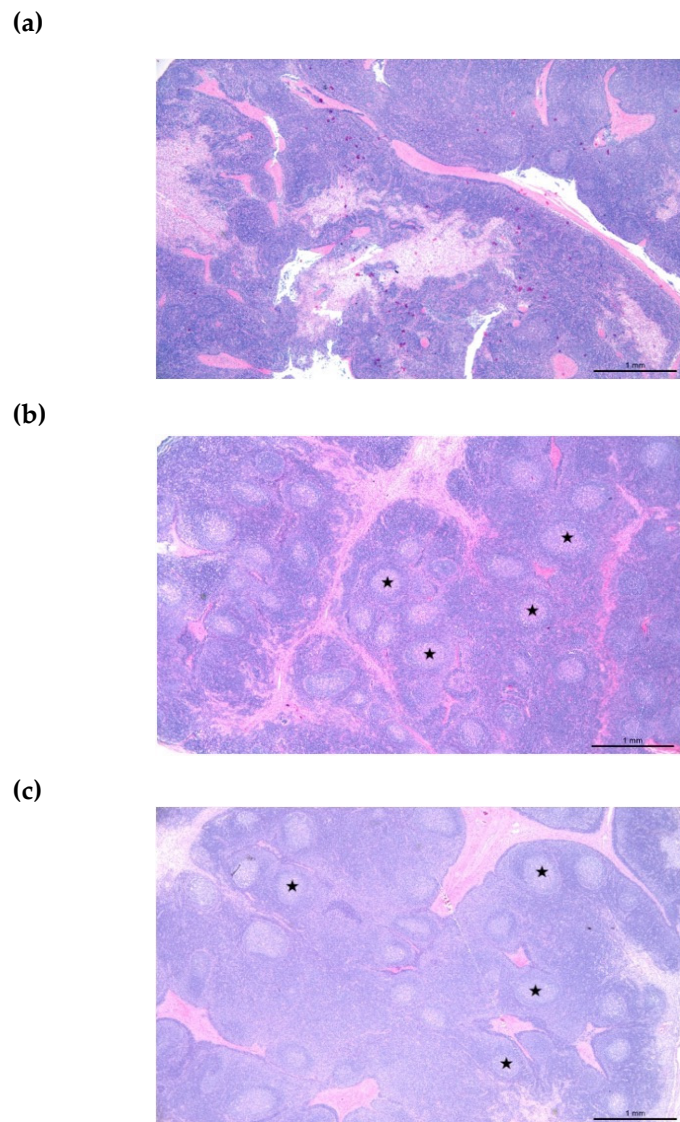

**Figure S3.** H&E staining of the submaxillary lymph nodes. **(a)** Pigs from the control group. **(b)** Pigs immunized with HLJ/18-7GD at 28 DPI. **(c)** Pigs immunized with HLJ/18-7GD at 60 DPI. Notable reactive lymph nodule hyperplasia was observed in the submaxillary lymph nodes of pigs immunized with HLJ/18-7GD at 28 and 60 DPI. H&E, hematoxylin and eosin; DPI, days post-inoculation.
